# Supplementary material
Source: PubMed Central journal article supplement (PMC6923591)
Supplement: NIHMS1541612-supplement-1.pdf [file NIHMS1541612-supplement-1.pdf]

Supplementary Table 1. Comparison of live cell imaging kinetic data using the GLIMMIX procedure

| Treatment comparison           | Genotype comparison                                                                        | Estimate | Pr >  t | Adj P  | OR 1   | OR 2   |
|--------------------------------|--------------------------------------------------------------------------------------------|----------|---------|--------|--------|--------|
| Birinapant v. DMSO             | <i>Ripk1</i> <sup>ΔPMN</sup> v wild-type                                                   | 0.0943   | <.0001  | <.0001 | 1.0514 | 0.9569 |
|                                | <i>Ripk1</i> <sup>D138N</sup> v wild-type                                                  | 0.0917   | <.0001  | <.0001 | 1.0768 | 0.9825 |
|                                | <i>Ptpn6</i> <sup>ΔPMN</sup> <i>Ripk1</i> <sup>D138N</sup> v wild-type                     | 0.1103   | <.0001  | <.0001 | 1.0726 | 0.9606 |
|                                | <i>Ripk1</i> <sup>D138N</sup> v <i>Ripk1</i> <sup>ΔPMN</sup>                               | -0.0026  | 0.6749  | 0.9988 | 1.0242 | 1.0268 |
|                                | <i>Ptpn6</i> <sup>ΔPMN</sup> <i>Ripk1</i> <sup>D138N</sup> v <i>Ripk1</i> <sup>ΔPMN</sup>  | 0.0160   | 0.0200  | 0.1142 | 1.0201 | 1.0039 |
|                                | <i>Ptpn6</i> <sup>ΔPMN</sup> <i>Ripk1</i> <sup>D138N</sup> v <i>Ripk1</i> <sup>D138N</sup> | 0.0186   | 0.0025  | 0.0148 | 0.9960 | 0.9777 |
| Birinapant/zVAD-fmk v. DMSO    | <i>Ripk1</i> <sup>ΔPMN</sup> v wild-type                                                   | 0.1529   | <.0001  | <.0001 | 1.1150 | 0.9569 |
|                                | <i>Ripk1</i> <sup>D138N</sup> v wild-type                                                  | 0.1403   | <.0001  | <.0001 | 1.1305 | 0.9825 |
|                                | <i>Ptpn6</i> <sup>ΔPMN</sup> <i>Ripk1</i> <sup>D138N</sup> v wild-type                     | 0.1474   | <.0001  | <.0001 | 1.1132 | 0.9606 |
|                                | <i>Ripk1</i> <sup>D138N</sup> v <i>Ripk1</i> <sup>ΔPMN</sup>                               | -0.0126  | 0.0399  | 0.2165 | 1.0139 | 1.0268 |
|                                | <i>Ptpn6</i> <sup>ΔPMN</sup> <i>Ripk1</i> <sup>D138N</sup> v <i>Ripk1</i> <sup>ΔPMN</sup>  | -0.0055  | 0.4065  | 0.9563 | 0.9984 | 1.0039 |
|                                | <i>Ptpn6</i> <sup>ΔPMN</sup> <i>Ripk1</i> <sup>D138N</sup> v <i>Ripk1</i> <sup>D138N</sup> | 0.0072   | 0.2870  | 0.8686 | 0.9847 | 0.9777 |
| zVAD-fmk/TNF v. TNF            | <i>Ripk1</i> <sup>ΔPMN</sup> v wild-type                                                   | 0.0742   | <.0001  | <.0001 | 1.0172 | 0.9445 |
|                                | <i>Ripk1</i> <sup>D138N</sup> v wild-type                                                  | -0.0024  | 0.7467  | 0.9997 | 0.9997 | 1.0021 |
|                                | <i>Ptpn6</i> <sup>ΔPMN</sup> <i>Ripk1</i> <sup>D138N</sup> v wild-type                     | 0.0046   | 0.5728  | 0.9939 | 0.9909 | 0.9863 |
|                                | <i>Ripk1</i> <sup>D138N</sup> v <i>Ripk1</i> <sup>ΔPMN</sup>                               | -0.0766  | <.0001  | <.0001 | 0.9828 | 1.0610 |
|                                | <i>Ptpn6</i> <sup>ΔPMN</sup> <i>Ripk1</i> <sup>D138N</sup> v <i>Ripk1</i> <sup>ΔPMN</sup>  | -0.0696  | <.0001  | <.0001 | 0.9741 | 1.0443 |
|                                | <i>Ptpn6</i> <sup>ΔPMN</sup> <i>Ripk1</i> <sup>D138N</sup> v <i>Ripk1</i> <sup>D138N</sup> | 0.0070   | 0.3810  | 0.9437 | 0.9912 | 0.9842 |
| Birinapant/zVAD-fmk/TNF v. TNF | <i>Ripk1</i> <sup>ΔPMN</sup> v wild-type                                                   | 0.2591   | <.0001  | <.0001 | 1.2239 | 0.9445 |
|                                | <i>Ripk1</i> <sup>D138N</sup> v wild-type                                                  | 0.1759   | <.0001  | <.0001 | 1.1948 | 1.0021 |
|                                | <i>Ptpn6</i> <sup>ΔPMN</sup> <i>Ripk1</i> <sup>D138N</sup> v wild-type                     | 0.1699   | <.0001  | <.0001 | 1.1690 | 0.9863 |
|                                | <i>Ripk1</i> <sup>D138N</sup> v <i>Ripk1</i> <sup>ΔPMN</sup>                               | -0.0833  | <.0001  | <.0001 | 0.9763 | 1.0610 |
|                                | <i>Ptpn6</i> <sup>ΔPMN</sup> <i>Ripk1</i> <sup>D138N</sup> v <i>Ripk1</i> <sup>ΔPMN</sup>  | -0.0892  | <.0001  | <.0001 | 0.9551 | 1.0443 |
|                                | <i>Ptpn6</i> <sup>ΔPMN</sup> <i>Ripk1</i> <sup>D138N</sup> v <i>Ripk1</i> <sup>D138N</sup> | -0.0060  | 0.4916  | 0.9827 | 0.9784 | 0.9842 |
| Birinapant/TNF v. TNF          | <i>Ripk1</i> <sup>ΔPMN</sup> v wild-type                                                   | 0.1258   | <.0001  | <.0001 | 1.0710 | 0.9445 |
|                                | <i>Ripk1</i> <sup>D138N</sup> v wild-type                                                  | 0.1011   | <.0001  | <.0001 | 1.1087 | 1.0021 |
|                                | <i>Ptpn6</i> <sup>ΔPMN</sup> <i>Ripk1</i> <sup>D138N</sup> v wild-type                     | 0.0927   | <.0001  | <.0001 | 1.0821 | 0.9863 |
|                                | <i>Ripk1</i> <sup>D138N</sup> v <i>Ripk1</i> <sup>ΔPMN</sup>                               | -0.0247  | 0.0878  | 0.4238 | 1.0352 | 1.0610 |
|                                | <i>Ptpn6</i> <sup>ΔPMN</sup> <i>Ripk1</i> <sup>D138N</sup> v <i>Ripk1</i> <sup>ΔPMN</sup>  | -0.0330  | 0.0300  | 0.1673 | 1.0103 | 1.0443 |
|                                | <i>Ptpn6</i> <sup>ΔPMN</sup> <i>Ripk1</i> <sup>D138N</sup> v <i>Ripk1</i> <sup>D138N</sup> | -0.0084  | 0.4106  | 0.9581 | 0.9760 | 0.9842 |

Contrast estimate tables from log-binomial linear mixed models of CTG+ proportion. Each row specifies a genotype comparison and treatment comparison of interest. "Estimate" gives the unlinked estimate of the difference, between the two treatments of interest, of the differences between the two genotypes of interest. "Pr > |t|" gives the *p*-value of a *t* test against a null hypothesis that the unlinked difference of differences is equal to 0. "Adj P" gives the Sidak-corrected *p*-value. "OR 1" gives the hourly odds ratio for remaining in the CTG+ state between the specified genotypes in the first of the two compared treatments (e.g. BPT in the first comparison). "OR 2" gives the hourly odds ratio of the same genotypes in the second of two compared treatments (e.g. DMSO in the first comparison).

**Supplementary Table 2. MS/MS analysis of proteins interacting with a wild-type Ptpn6 peptide from the C-SH2 domain of Ptpn6.**

| <b>Proteins identified</b>         | <b>Species</b>      | <b>Number of peptides identified</b> | <b>Accession number</b> |
|------------------------------------|---------------------|--------------------------------------|-------------------------|
| <b>Band A (upper)</b>              |                     |                                      |                         |
| Myosin-9                           | <i>Mus musculus</i> | 106 (52 % coverage)                  | Q8VDD5                  |
| Actin, cytoplasmic 1               | <i>Mus musculus</i> | 4 (18 % coverage)                    | P60710                  |
| <b>Band B (lower)</b>              |                     |                                      |                         |
| Actin, cytoplasmic 2               | <i>Mus musculus</i> | 29 (81 % coverage)                   | P63260                  |
| Actin, cytoplasmic 1               | <i>Mus musculus</i> | 30 (81 % coverage)                   | P60710                  |
| Lamin-B receptor                   | <i>Mus musculus</i> | 1 (2 % coverage)                     | Q3U9G9                  |
| Serine/threonine-protein kinase N1 | <i>Mus musculus</i> | 1 (1 % coverage)                     | P70268                  |

Interacting proteins were isolated by incubation of biotinylated wild-type (Y208) peptides with mouse bone marrow neutrophil lysates and streptavidin beads. Protein complexes were analyzed by SDS-PAGE, and 2 bands were excised and subjected to LS-MS/MS analysis.
